# Supplementary material
Source: Springer Nature journal article supplement (https://www.springermedizin.de/resource/supplementary/12992_2013_244_MOESM2_ESM.pdf/9616288)

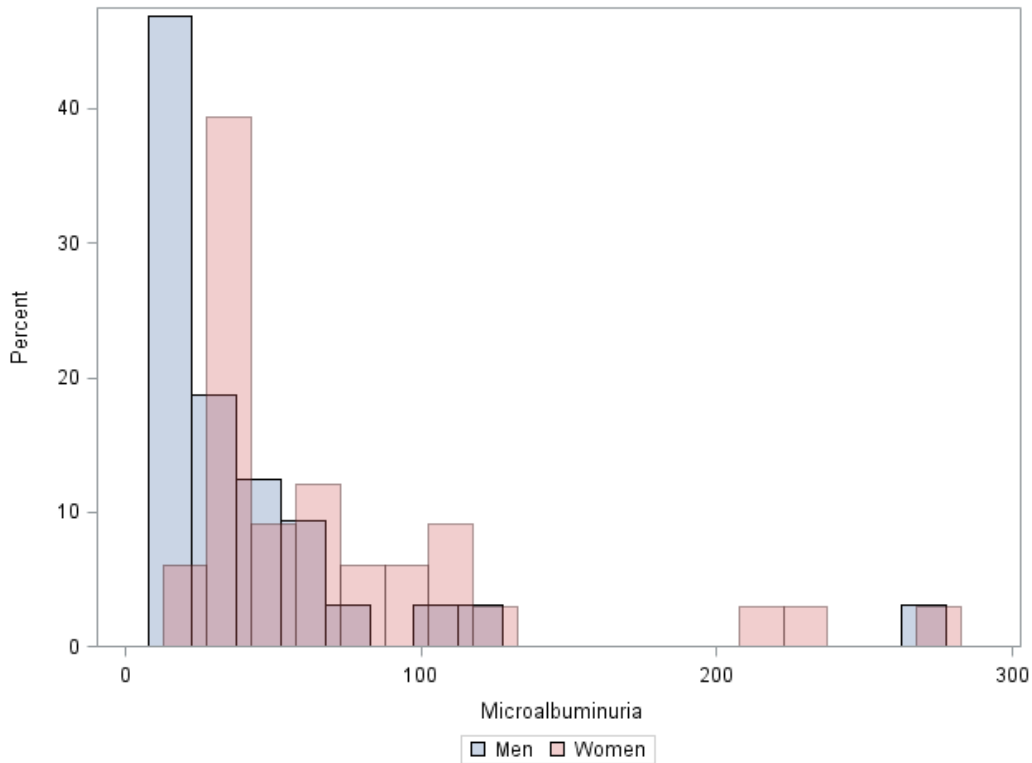

Supplement: MOESM2 [file 9616288]
